# Supplementary material for: Phosphodiesterolytic activity of alkaline-earth cations in aqueous DMSO
Source: Royal Society of Chemistry journal article supplement (doi:10.1039/b402432j), 2004-01-01
Supplement: b402432j.doc [file b402432j.doc]

Supplementary Information

**Fig.1S.** Effects of alkaline metal chlorides on the rate of hydrolysis of BNPP in 90% v/v DMSO at 25oC in the presence of 0.03 M (*n*-Bu)4NOH.

A B

**Fig. 2S.** Observed first-order rate constants for the BNPP hydrolysis at 25°C in 90% v/v DMSO in the presence of 2 mM MgCl2 vs. the base concentration. A - (*n*-Bu)4NOH, B- NaOH.

**Fig. 3S.** Observed first-order rate constants for the BNPP hydrolysis at 25°C in 90% v/v DMSO in the presence of 1 mM CaCl2 vs. the base concentration. Solid squares - (*n*-Bu)4NOH, open squares – NaOH.

**Fig.4S.** Titration curves for 1 mM HCl alone (solid triangles) and in the presence of 1 mM SrCl2 (open triangles); *a* is the number of mole equivalents of (*n*-Bu)4NOH per 1 mole of Sr(II). Solid lines are the fitting curves generated by HYPERQUAD 2000 with the equilibrium constants for reactions (1)-(4) given below.

H2O H+ + OH- log0-1=-21.30 (1)

2 Sr2+ Sr2OH3+ + H+, log2-1=-9.85 (2)

Sr2+ SrOH+ + H+, log1-1=-14.65 (3)

Sr2+ Sr(OH)2 + 2 H+, log1-2=-31.31 (4)

The “autoprotolysis” of water in fact involves the proton transfer from water to DMSO and given value of 0-1 refers to the product of concentrations of solvated H+ and OH- ions without correction for the reduced water concentration.

**Fig.5S.** Titration curves for the mixture of 1 mM HCl and 2 mM MgCl2 (solid triangles) and for the mixture of 1 mM HCl, 2 mM MgCl2 and 6 mM NaCl (open triangles); *a* is the number of mole equivalents of (*n*-Bu)4NOH per 1 mole of Mg(II). Solid lines are the fitting curves generated by HYPERQUAD 2000 with the equilibrium constants for reactions (1), (5)-(8) given below.

Mg2+ Mg(OH)2 + 2 H+, log1-2=-21.86 (5)

Mg2+ + Na+ MgNa(OH)2+ + 2 H+, log11-2=-20.46 (6)

Mg2+ + Na+ MgNa(OH)3 + 3 H+, log11-3=-34.59 (7)

Mg2+ + Na+ MgNa(OH)74- + 7 H+, log11-7=-99.05 (8)

The reaction (8) is required to account for a part of the titration curve obtained in the presence of NaCl after addition of ca. 3.5 equivalents of the base. For some reasons, which we cannot explain satisfactorily by the moment this part of the curve is very flat and passes below pH values expected on the basis of the autoprotolysis constant found from the titration of HCl. Formally this can be accounted for as formation of an aggregate of the composition MgNa(OH)74-, which perhaps includes also several tetrabutylammonium cations, but more probably this is a systematic error caused by some effect of NaCl on the electrode or activity coefficients of the ionic species.
